# Supplementary material
Source: Springer Nature journal article supplement (https://www.springermedizin.de/resource/supplementary/12984_2007_139_MOESM7_ESM.pdf/9605390)

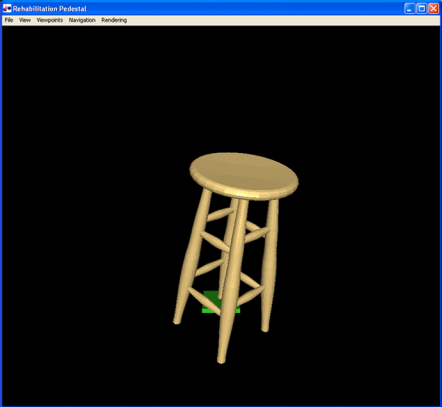

(a)

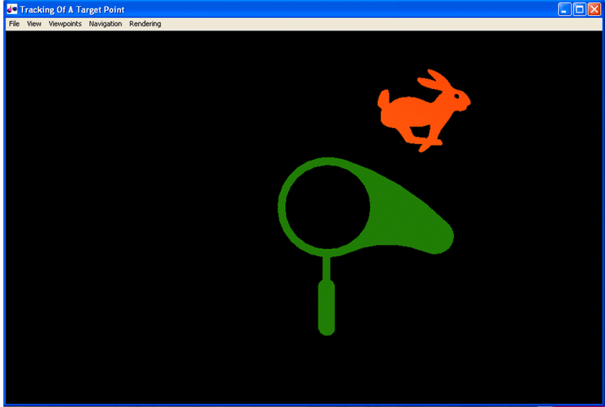

(b)

Supplement: MOESM7 [file 9605390]
